# Supplementary material for: Application of a Quantitative PCR to Investigate the Distribution and Dynamics of Two Morphologically Similar Species, Karenia mikimotoi and K. papilionacea (Dinophyceae) in Korean Coastal Waters
Source: MDPI journal article supplement (doi:10.3390/toxins15070469), 2023-07-20
Supplement: s1 [file s1]

# Supplementary materials: Application of a Quantitative PCR to Investigate the Distribution and Dynamics of Two Morphologically Similar Species, *Karenia mikimotoi* and *K. papilionacea* (Dinophyceae) in Korean Coastal Waters

Sunju Kim, Minji Cho, Jiae Yoo and Bum Soo Park

**Table S1.** List of sampling locations, sampling dates, temperature, salinity, cell abundances (cells L<sup>-1</sup>) of *K. papilionacea* (Kp) and *K. mikimotoi* (Km) estimated by qPCR assay at each site in Korean coastal waters in September 2017.

|            | St. | Sampling site     | Latitude   | Longitude   | Sampling date | Temp. (°C) | Sal. | Kp   | Km  |
|------------|-----|-------------------|------------|-------------|---------------|------------|------|------|-----|
| East Sea   | S1  | Gangneung         | 37°46'19"N | 128°57'04"E | 3 Sep 2017    | 23.9       | 30.9 | -    | -   |
|            | S2  | Daejin, Donghae   | 37°34'53"N | 129°06'43"E | 3 Sep 2017    | 23.9       | 30.9 | -    | -   |
|            | S3  | Sadong, Uljin     | 36°49'22"N | 129°26'57"E | 3 Sep 2017    | 24.2       | 31.4 | -    | 6   |
|            | S4  | Hakri, Gijang     | 35°15'30"N | 129°14'48"E | 3 Sep 2017    | 24.9       | 30.9 | 1147 | -   |
| South Sea  | S5  | Yongho, Busan     | 35°07'57"N | 129°07'15"E | 8 Sep 2017    | 25.8       | 30.4 | 39   | -   |
|            | S6  | Jangcheon, Jinhae | 35°07'40"N | 128°41'55"E | 3 Sep 2017    | 25.3       | 31.9 | -    | -   |
|            | S7  | Dotseom, Masan    | 35°10'33"N | 128°34'11"E | 3 Sep 2017    | 26.3       | 27.7 | -    | -   |
|            | S8  | Dangdong, Goseong | 34°59'20"N | 128°24'34"E | 3 Sep 2017    | 27.7       | 31.8 | -    | -   |
|            | S9  | Goseong           | 34°56'19"N | 128°12'06"E | 3 Sep 2017    | 26.5       | 33.0 | -    | -   |
|            | S10 | Mijo, Namhae      | 34°42'53"N | 128°03'06"E | 3 Sep 2017    | 25.5       | 32.9 | 336  | -   |
|            | S11 | Bangjukpo, Yeosu  | 34°37'55"N | 127°47'32"E | 2 Sep 2017    | 26.0       | 30.0 | 2477 | 3   |
|            | S12 | Jakgeum, Yeosu    | 34°35'40"N | 127°45'31"E | 2 Sep 2017    | 25.3       | 31.4 | 98   | -   |
|            | S13 | Nokdong, Goheung  | 34°31'34"N | 127°08'06"E | 2 Sep 2017    | 25.3       | 31.4 | -    | -   |
|            | S14 | Wando             | 34°19'38"N | 126°48'32"E | 2 Sep 2017    | 23.9       | 31.9 | 21   | -   |
| Yellow Sea | S15 | Buk harbor, Mokpo | 34°48'23"N | 126°21'55"E | 2 Sep 2017    | 24.6       | 28.8 | -    | -   |
|            | S16 | Gyeokpo, Buan     | 35°37'21"N | 126°28'10"E | 2 Sep 2017    | 24.8       | 31.9 | 26   | -   |
|            | S17 | Bieung, Gunsan    | 35°56'18"N | 126°31'52"E | 2 Sep 2017    | 25.9       | 31.5 | -    | 13  |
|            | S18 | Magumpo, Taean    | 36°37'22"N | 126°17'10"E | 2 Sep 2017    | 24.4       | 31.5 | 14   | 122 |

**Table S2.** Calculated cell number (per mL) by direct counting and quantitative real-time PCR assay for the comparison of cell numbers between strains. qPCR values represent means ± SE.

| Species                | Strain     | Cells number via light microscope | Cells number via standard curve | Strain for plotting standard curve |
|------------------------|------------|-----------------------------------|---------------------------------|------------------------------------|
| <i>K. papilionacea</i> | KP-LOMME02 | 600                               | 639 ± 178                       | KP-LOMME01                         |

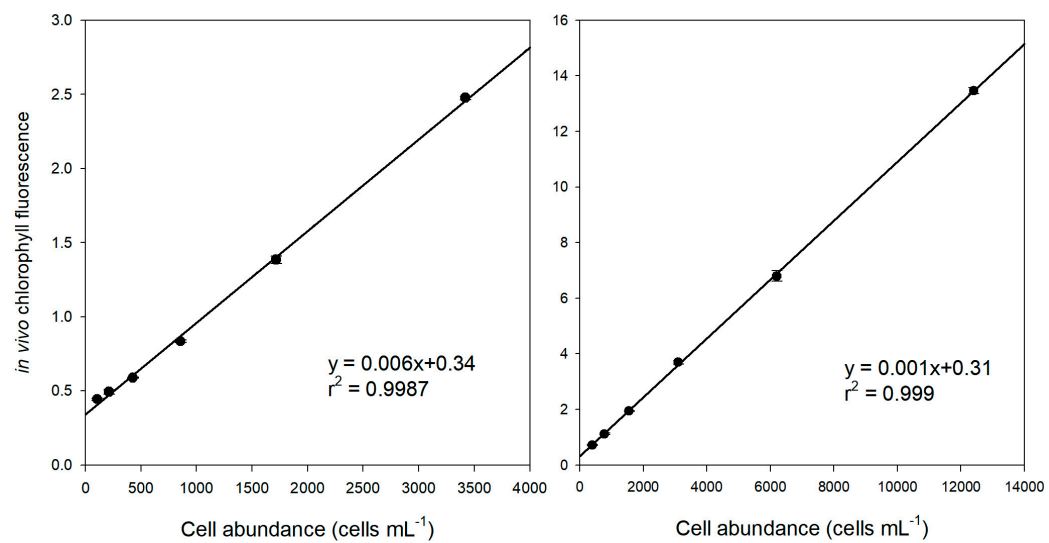

**Figure S1.** Relationship between cell abundance and *in vivo* chlorophyll fluorescence in *K. papilionacea* (A) and *K. mikimotoi* (B).
